# Supplementary material for: Sorghum-derived porous carbon for outstanding green supercapacitors
Source: Royal Society of Chemistry journal article supplement (doi:10.1039/d3nj04881k), 2023-11-22
Supplement: d3nj04881k1.pdf [file d3nj04881k1.pdf]

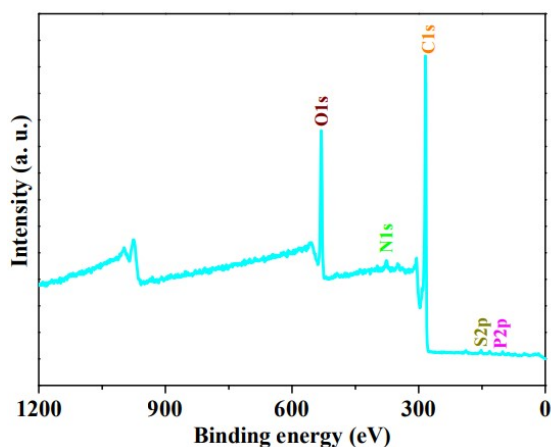

Figure S1 Survey spectrum and high-resolution spectra of SAC-2

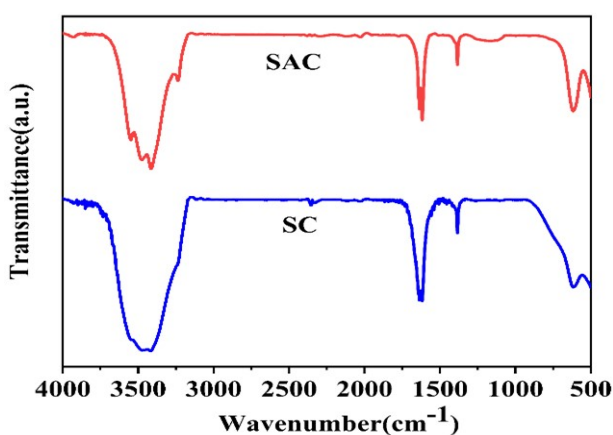

Figure S2 FT-IR spectra of SAC-2 and SC

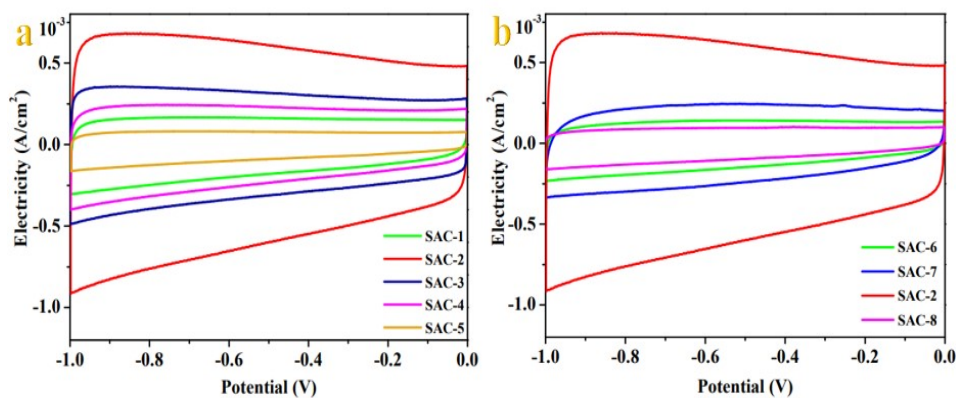

Figure S3 CV curves of SAC samples at 100 mV/s

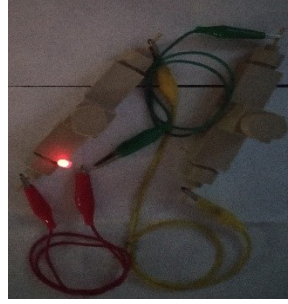

Figure S4 photograph of lighting LED bulbs

Table S1 Capacitances of SAC samples

| Samples | 1 A g <sup>-1</sup> | 2 A g <sup>-1</sup> | 5 A g <sup>-1</sup> | 10 A g <sup>-1</sup> | 20 A g <sup>-1</sup> |
|---------|---------------------|---------------------|---------------------|----------------------|----------------------|
| SC      | 216.4               | -                   | -                   | -                    | -                    |
| SAC-1   | 340.7               | 301.6               | 276.5               | 217.8                | 186.4                |
| SAC-2   | 918                 | 602.4               | 438.2               | 377                  | 337.3                |
| SAC-3   | 701.4               | 568.3               | 416.2               | 327.5                | 286.4                |
| SAC-4   | 417                 | 365.2               | 326.5               | 287.3                | 237.2                |
| SAC-5   | 276.1               | 235.7               | 210.5               | 186.3                | 165.2                |
| SAC-6   | 564.7               | 527.3               | 386.4               | 301.2                | 265.3                |
| SAC-7   | 643.5               | 568.4               | 420.3               | 327.1                | 287.5                |
| SAC-8   | 247.8               | 215.4               | 186.3               | 146.2                | 115.6                |
